# Supplementary material for: Decoupling the downstream effects of germline nuclear RNAi reveals that H3K9me3 is dispensable for heritable RNAi and the maintenance of endogenous siRNA-mediated transcriptional silencing in Caenorhabditis elegans
Source: Epigenetics Chromatin. 2017 Feb 15;10:6. doi: 10.1186/s13072-017-0114-8 (PMC5311726; doi:10.1186/s13072-017-0114-8)
Supplement: Supplementary file 9 — Additional file 9: Table S2. Oligonucleotides and other sequences used in this study. [file 13072_2017_114_MOESM9_ESM.xlsx]

## Sheet: Sheet1
Table S2: Oligonucleotides and other sequences used in this study.
gene name	oligo or plasmid name	sequence	description
oma-1	pSG42	gtCtctcaacgccatgcattggctgacattcgCgatcaaatggagcagcacatcatgactaaCggtcgcattgcagctcccccgctttctgcGattcagcatcctttagaaatgtttgccagAccatcaactccagatgagccagcggctaaGttgccactaggaccaactcctgttagtacCcgtggtccaagatatgagctaccaacgaaAgaattgcatgacgcggaaggtgcgatgacTtatccaccgtctcgctggccattggatccGtcgatgtttgctctagacgcttggaatatggcCcatcggccagctagtccactcgattcAatggttttgggttccgctccaaatgctggTtcgttcggaatgctcggaaagcaaaatacCcctgga…	oma-1 dsRNA trigger; chrIV:8,889,833-8,890,353; exclude intron; 478 bp; capital letters are mismatch every ~30nt; vector backbone L4440
GFP	pSG74		partial GFP (715 bp) insert, vector backbone L4440,
hrde-1(tm1200)	SG-386	ttcgtgtcgaagttgtctcg	SG-386 and SG-387 are oligoes for genotyping hrde-1 (tm1200), PCR product for WT is 648 bp, tm1200 is 272 bp
hrde-1(tm1200)	SG-387	ttcgtgtcgaagttgtctcg
met-2(n4256)	SG-778	gtcacatcacctgcatcagc	SG-778 and SG-779 are oligoes for met-2(n4256) genotyping, mutant 461bp; WT 1804bp
met-2(n4256)	SG-779	tctattcccaggagccaatg
met-2(n4256)	SG-834	GTTGGCAGCCGTAATGAAAT	SG-834 and SG-835 are oligos for met-2(n4256) genotyping, WT 248bp, mutant no product, primers in the deletion region
met-2(n4256)	SG-835	CGAGCCAGACAGAAATCTCC
set-25(ok5021)	SG-1318	GACACTCGACCGTTTCCACT	SG-1318 and SG-1319 are set-25 (ok5021) genotyping oligos; mutant 732 bp, WT does not have a product (too large)
set-25(ok5021)	SG-1319	ACTCGACGAGGCTCTGAAAC
set-25(ok5021)	SG-836	ATATGGATGCCCACGAGAAG	SG-836 and SG-837 are oligos for set-25(n5021) genotyping, WT is 356 bp, mutant no product, primers in the deletion region
set-25(ok5021)	SG-837	CCGTGAAAAAGAGCATCACA
set-32 (ok1457)	SG-1144	cggagcaggatttcccgata	SG-1144 and SG-1145, primers to genotype set-32( ok1457), chrI:9519414-9520167 ; WT - 754bp, mutant - 240 bp
set-32 (ok1457)	SG-1145	gggcagttttcgttttcgta
oma-1	SG-1018	acatgtatttttgctcactgtaa	SG-1018 and SG-1019 are oligos for H3K9me3 qPCR, oma-1, gDNA, intron+ex5, chrIV: 8,889,800 - 8,889,957; 158bp
oma-1	SG-1019	ggcctggcaaacatttctaa
ChIP control region	SG-1044	agccatggcacaaaaagaag	SG-1044 and SG-1045 are oligos for qPCR as H3K9me3 control region (reference), chrII:6,708,915-6,709,320; 201bp
ChIP control region	SG-1045	tgtggcctgagaagacaaaa
oma-1	SG-1016	ctacaggactctgcccatacg	SG-1016 and SG-1019 are oligos for mRNA qRT-PCR, oma-1, chrIV:8,889,697-8,889,956 excluding intron; 261 bp
oma-1	SG-1022	ttaatgacctctgttttaggtg	SG-1022 and SG1023 are oligos for qRT-PCR, oma-1, pre-mRNA, SG-1022 covers intron-ex6 junction, chrIV: 8,890,089 - 8,890,222; 134 bp
oma-1	SG-1023	gaacccaaaaccatcgaatc
tba-1	SG-1108	TCCAAGCGAGACCAGGCTTCAG	SG-1108 and SG-1109 are oligos for mRNA and pre-mRNA qRT-PCR control; tba-1, Chr I: 9786104-9786296; 192 bp
tba-1	SG-1109	TCAACACTGCCATCGCCGCC
set-9(red8)	Exon 1 sequence with STOP codon and frame shift	ATGGCAGACGGAGAGCATACGCTTCCAGCCGACGAGGAGCTCTTCGAGCAACCACCACgctagctCAACAACAACCCGAAATCGCCGAGCCAATTGTTATGGCTCAAG	Stop codon and frame shift induced by CRISPR in exon 1 of set-9 gene, chrIV: 4312497-4312501
set-9(red8)	SG-1128	CGCAATTTTTCCGTCATTTT	SG-1128 and SG-1129 are oligos for set-9(red8) genotyping; WT and mutant PCR size is ~ 630bp; mutant cut with NheI to 530bp+100bp.
set-9(red8)	SG-1129	GACTCCTTGAATGGGCTCTG
